# Supplementary figures and images for: Effect of Oxygen Plasma Pre-Treatment on the Surface Properties of Si-Modified Cotton Membranes for Oil/Water Separations
Source: MDPI journal article supplement (doi:10.3390/ma15238551), 2022-11-30

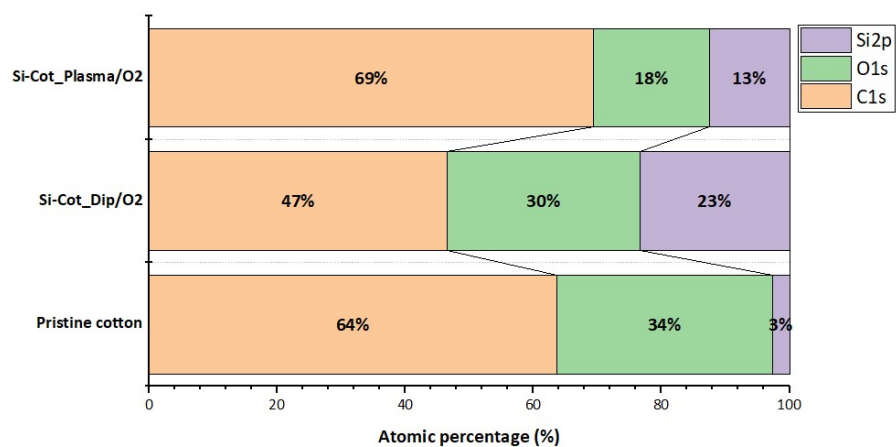

Figure S1. Atomic percentage for Pristine, Si-Cot\_Dip/O<sub>2</sub>, Si-Cot\_Plasma/O<sub>2</sub> samples.

Supplement: s1 [file s1]
